# Supplementary material for: Waste-Derived NPK Nanofertilizer Enhances Growth and Productivity of Capsicum annuum L
Source: MDPI journal article supplement (doi:10.3390/plants10061144), 2021-06-04
Supplement: s1 [file s1]

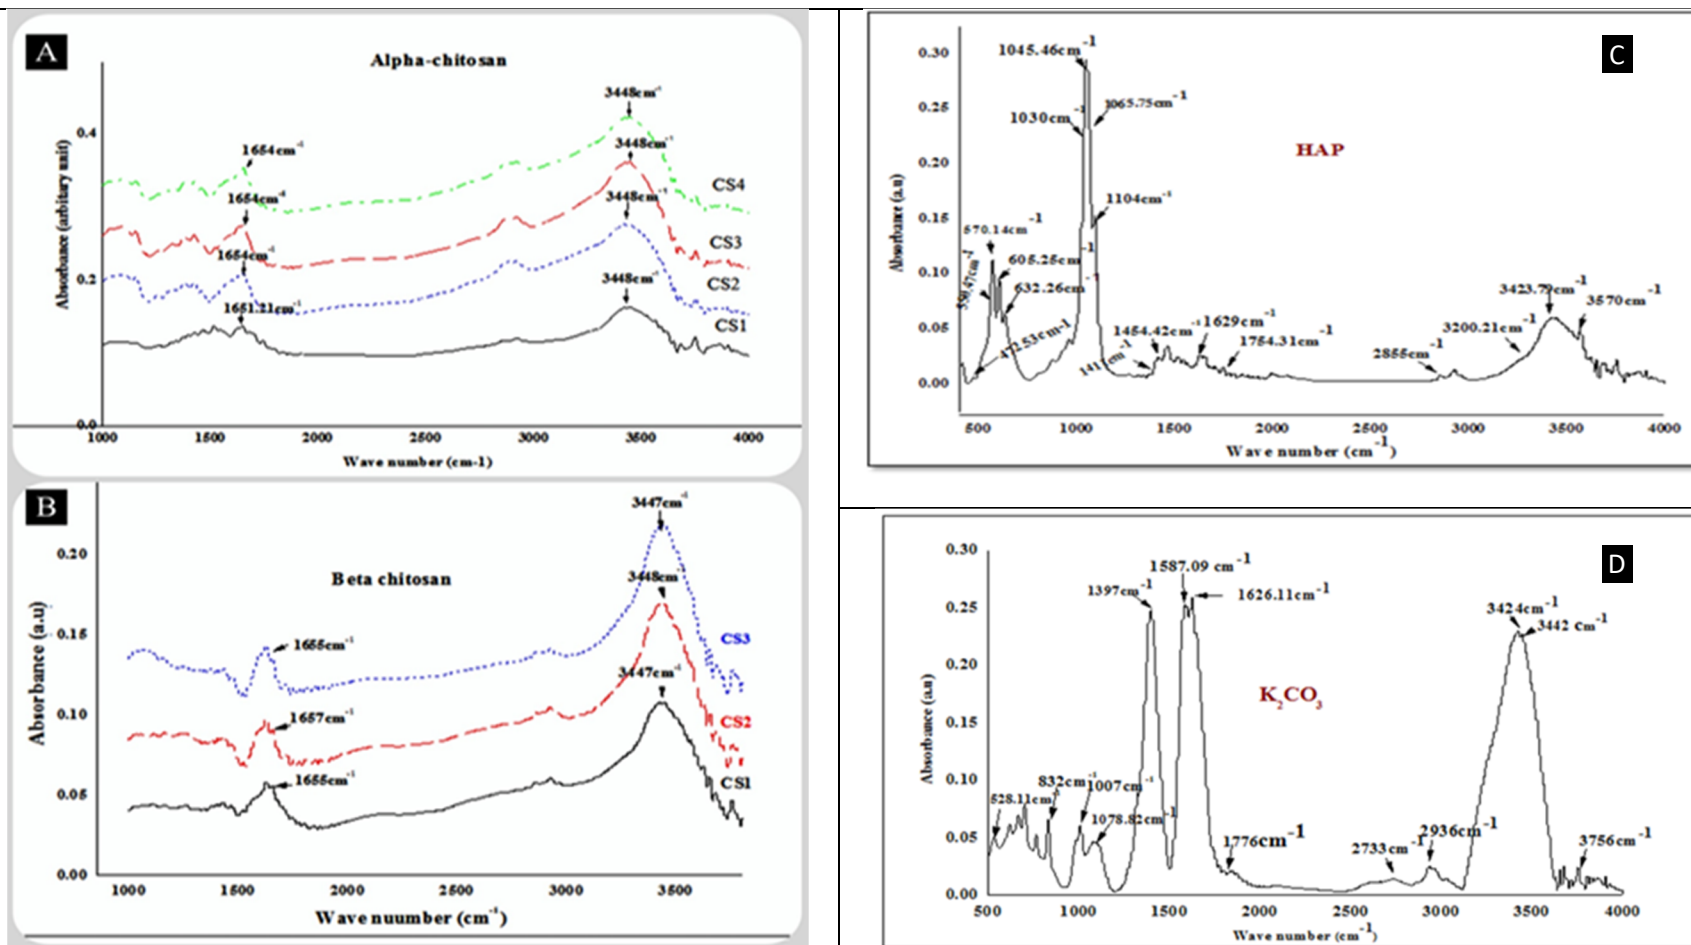

Figure S1. FT-IR spectra of  $\alpha$ -CS (A),  $\beta$ -CS (B), (C) HAP and (D) PC obtained from recycled solid waste.

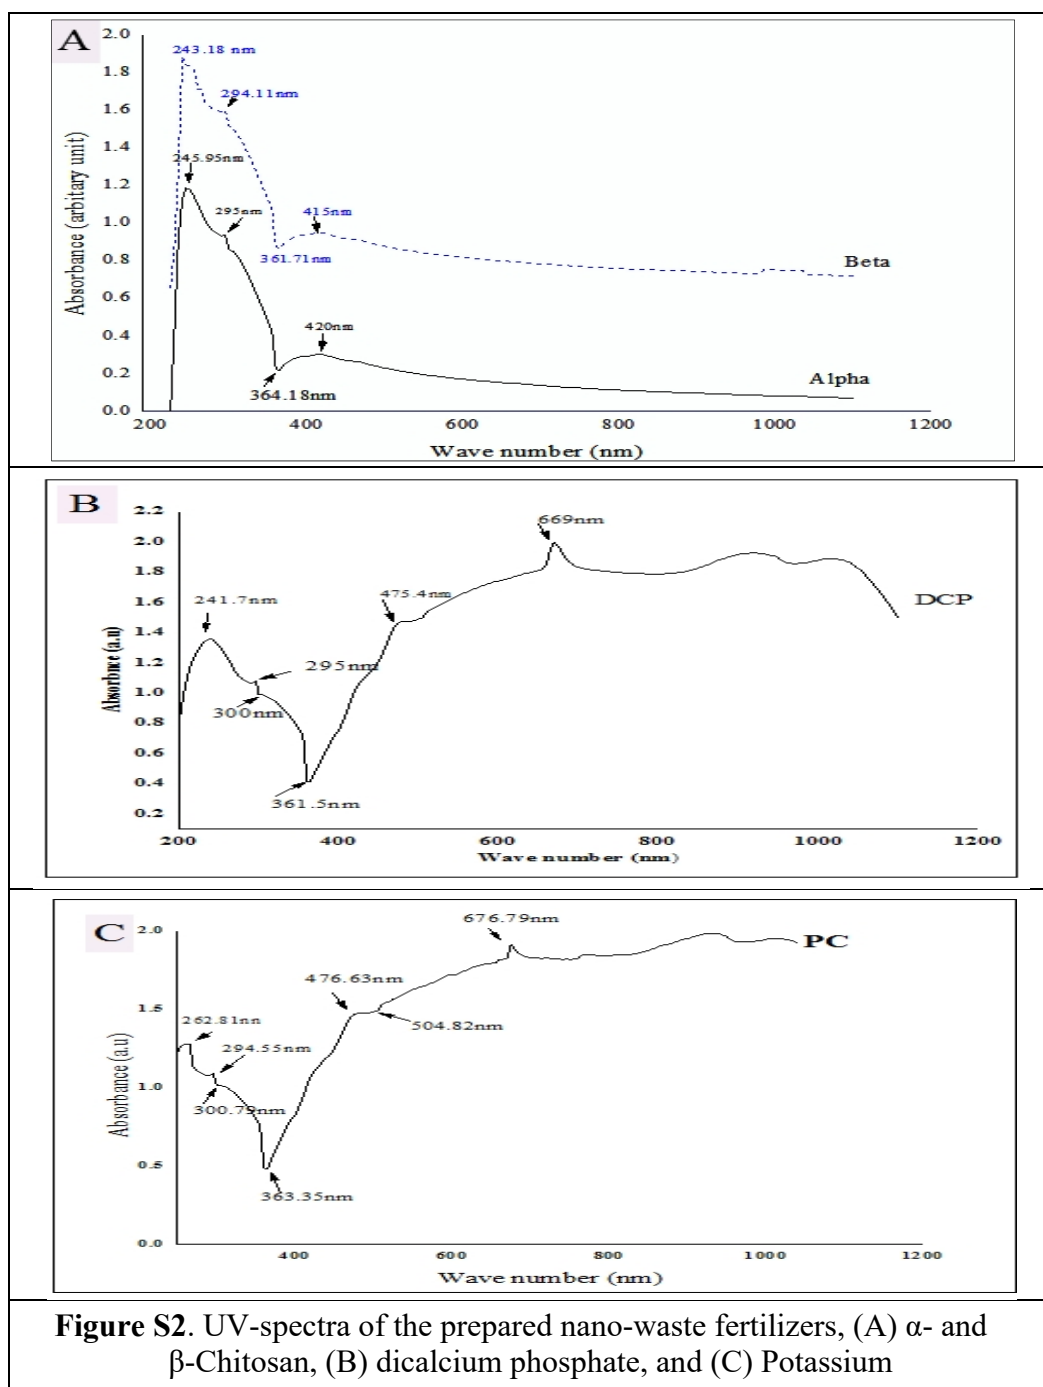

**Figure S2.** UV-spectra of the prepared nano-waste fertilizers, (A)  $\alpha$ - and  $\beta$ -Chitosan, (B) dicalcium phosphate, and (C) Potassium

| Table S1:Wave length (cm <sup>-1</sup> ) of the main bands obtained for the prepared α- and β- Chitosans.    |         |       |       |                   |       |       |       |
|--------------------------------------------------------------------------------------------------------------|---------|-------|-------|-------------------|-------|-------|-------|
| Vibration modes                                                                                              | α-CS1   | α-CS2 | α-CS3 | α-CS4             | β-CS1 | β-CS2 | β-CS3 |
| NH out – of – plane bending                                                                                  | 752     | 752   | 752   | 742               | 751   | 752   | 752   |
| Ring stretching (CH bending out)                                                                             | 895     | 897   | 897   | 897               | 897   | 894   | 897   |
| CO stretching                                                                                                | 1067    | 1035  | 1035  | 1034              | 1033  | 1032  | 1033  |
| C-O-C bridge                                                                                                 | 1156    | 1154  | 1153  | 1154              | 1157  | 1164  | 1164  |
| C-N stretching of amide III                                                                                  | 1321    | 1322  | 1321  | 1321              | 1321  | 1318  | 1318  |
|                                                                                                              | 1343    | 1344  | 1344  | 1341              | 1347  | 1344  | 1344  |
| CH <sub>2</sub> bending and CH <sub>3</sub> deformation                                                      | 1427    | 1425  | 1424  | 1424              | 1435  | 1432  | 1432  |
| Amide II band (N-H bending)                                                                                  | 1545    | 1524  | 1523  | 1459              | 1469  | 1522  | 1522  |
| Amide I band                                                                                                 | 1651.21 | 1654  | 1654  | 1654              | 1655  | 1657  | 1655  |
| CH stretching                                                                                                | 2860    | 2886  | 2886  | 2886              | 2887  | 2857  | 2857  |
| Symmetric CH <sub>3</sub> stretching and asymmetric CH <sub>2</sub> stretching                               | 2925    | 2923  | 2922  | 2923              | 2927  | 2926  | 2927  |
| OH stretching                                                                                                | 3448    | 3448  | 3447  | 3448              | 3447  | 3448  | 3447  |
| Wave length (cm <sup>-1</sup> ) of the main bands obtained for the prepared K <sub>2</sub> CO <sub>3</sub> . |         |       |       |                   |       |       |       |
| Symmetric stretch of free carbonates(polydentate)                                                            |         |       |       | 1078.82           |       |       |       |
| Free carbonates bending mode                                                                                 |         |       |       | 702 and 823       |       |       |       |
| Free bicarbonates                                                                                            |         |       |       | 1587.09           |       |       |       |
| Symmetric stretching mode of bidentate carbonates(C=O)                                                       |         |       |       | 1626.11           |       |       |       |
| Symmetric bending mode of bidentate carbonates(C=O)                                                          |         |       |       | 1776              |       |       |       |
| Symmetric bending mode of monodentate carbonate (C-O)                                                        |         |       |       | 1397              |       |       |       |
| OH- group stretching                                                                                         |         |       |       | 3424-3442         |       |       |       |
| Wave length (cm-1) of the main bands obtained for the prepared HAP..                                         |         |       |       |                   |       |       |       |
| O—P—O asymmetric bending                                                                                     |         |       |       | 570.14 and 605.25 |       |       |       |
| Asymmetric PO stretching                                                                                     |         |       |       | 1030              |       |       |       |
| H2O absorbed by the lattice                                                                                  |         |       |       | 3200-3570         |       |       |       |
| Free CO <sub>3</sub> <sup>2-</sup>                                                                           |         |       |       | 1629              |       |       |       |
| OH- group bending                                                                                            |         |       |       | 632.26            |       |       |       |
| OH- group stretching                                                                                         |         |       |       | 3570              |       |       |       |
| PO43- (free ion) stretching mode                                                                             |         |       |       | 1045              |       |       |       |
| P-O-- stretching                                                                                             |         |       |       | 1104              |       |       |       |
| Fatty acids                                                                                                  |         |       |       | 1754.31           |       |       |       |
| Carbonated HAP                                                                                               |         |       |       | 1411-1454.42      |       |       |       |

| <b>Table S2: Particle size (nm) of prepared waste nano particles.</b> |                                              |
|-----------------------------------------------------------------------|----------------------------------------------|
| <b>Waste Nano-Particles name</b>                                      | <b>Particle size (nm)<math>\pm</math>S.E</b> |
| $\alpha$ -CS-NPs                                                      | 17.41 $\pm$ 1.86                             |
| $\beta$ -CS-NPs                                                       | 14.20 $\pm$ 2.03                             |
| DCP-NPs                                                               | 12.71 $\pm$ 0.28                             |
| K <sub>2</sub> CO <sub>3</sub> -NPs                                   | 28.30 $\pm$ 2.21                             |
